# Supplementary material
Source: MDPI journal article supplement (https://www.mdpi.com/1424-8220/12/3/3669)
Supplement: s2 [file s2]

#============================================================================= 
data_global
#=============================================================================  
# 1. SUBMISSION DETAILS 
 

_publ_contact_author_name         		'Daniel B. Leznoff' 
_publ_contact_author_address 
; 
Department of Chemistry
Simon Fraser University
8888 University Drive
Burnaby BC   Canada
V5A 1S6
; 
 
_publ_contact_author_phone        		'+1-778-782-4887' 
_publ_contact_author_fax          		'+1-778-782-3768' 
_publ_contact_author_email        		'dleznoff@sfu.ca' 
_publ_requested_journal           		'Dalton'  
#============================================================================= 
# 2. PROCESSING SUMMARY (IUCr Office Use Only) 
_journal_date_recd_electronic     	? 
_journal_date_to_coeditor         	? 
_journal_date_from_coeditor       	? 
_journal_date_accepted           	? 
_journal_date_printers_first      	? 
_journal_date_printers_final      	? 
_journal_date_proofs_out          	? 
_journal_date_proofs_in           	? 
_journal_coeditor_name            	? 
_journal_coeditor_code            	? 
_journal_coeditor_notes 
; 
 ? 
; 
_journal_techeditor_code          	? 
_journal_techeditor_notes 
; 
 ? 
; 
_journal_coden_ASTM               	? 
_journal_name_full                		? 
_journal_year                     		? 
_journal_volume                   		? 
_journal_issue                    		? 
_journal_page_first               		? 
_journal_page_last                		? 
_journal_suppl_publ_number        	? 
_journal_suppl_publ_pages         	? 
 
#============================================================================= 
# 3. TITLE AND AUTHOR LIST 
 
_publ_section_title 
; 
Vapochromic behaviour of M[Au(CN)2]2-based 
coordination polymers (M = Co, Ni)
; 
 
# The loop structure below should contain the names and addresses of all 
# authors, in the required order of publication. Repeat as necessary. 
loop_ 
 _publ_author_name 
 _publ_author_address 

 
	'Lefebvre, Julie' 
;	Department of Chemistry
	Simon Fraser University
	Burnaby, British Columbia
	Canada 		V5A 1S6
;
	'Korcok, Jasmine L.'
;	Department of Chemistry
	Simon Fraser University
	Burnaby, British Columbia
	Canada 		V5A 1S6
;
 	'Katz, Michael J.'
;	Department of Chemistry
	Simon Fraser University
	Burnaby, British Columbia
	Canada 		V5A 1S6
;
	'Leznoff, Daniel B.'
;	Department of Chemistry
	Simon Fraser University
	Burnaby, British Columbia
	Canada 		V5A 1S6
;

#============================================================================== 
# 4. TEXT
_publ_section_abstract
;
 ?  #Insert appropriate text here if wanted.
;
_publ_section_comment
;
 ?  #Insert appropriate text here if wanted.
;
_publ_section_experimental
;
 ?  #Insert appropriate text here if wanted.
;
## -------------------REFERENCES ----------------------##  
_publ_section_references 
;
 Gabe, E.J.; White, P.S.; Enright, G.D.
 DIFRAC A Fortran 77 Control Routine  for 4-Circle Diffractometers,
 N.R.C., Ottawa, 1995.

 Gabe, E.J., Le Page, Y., Charland,.J.-P., Lee, F.L. and White, P.S.
 (1989) J. Appl. Cryst., 22, 384-387.

 International Tables for X-ray Crystallography, Vol. IV, (1974)
 Kynoch Press, Birmingham, England.

 Johnson, C.K., (1976) ORTEP - A Fortran Thermal Ellipsoid Plot
 Program, Technical Report ORNL-5138, Oak Ridge National Lab., U.S.A.

 Le Page, Y., (1988) J. Appl. Cryst., 21, 983-984.

 Le Page, Y. and Gabe, E.J., (1979) J. Appl. Cryst., 12, 464-466.


# CRYSTALS
#
Watkin, D.J., Prout, C.K., Carruthers, J.R., Betteridge, P.W. & Cooper
R.I. (2001) CRYSTALS
Issue 11. Chemical Crystallography Laboratory, OXFORD, UK.

# Extinction correction
#
Larson, A.C. (1970), Crystallographic Computing, Ed  Ahmed, F.R.,
Munksgaard, Copenhagen, 291-294

#CAMERON
#
Watkin, D.J., Prout, C.K. & Pearce, L.J. (1996) CAMERON, Chemical
Crystallography Laboratory, OXFORD, UK.

#ORTEP-3 version 1.073
#
Farrugia, L.J., (1997) J. Appl. Cryst. 30, 565.

# SIR92                                                                         
#                                                                               
Altomare, A., Cascarano, G., Giacovazzo G., Guagliardi A., Burla M.C.,          
Polidori, G.  & Camalli, M. (1994) SIR92 - a program for automatic solution of  
crystal structures by direct methods. J. Appl. Cryst. (27), 435-435

# SHELXS 86                                                                     
#                                                                               
Sheldrick, G.M. (1986).  SHELXS86. Program for the solution of                  
crystal structures.  Univ. of Gottingen, Federal Republic of Germany.

 ?  #Insert any other references here
;
_publ_section_figure_captions
;
 ?  #Insert figure captions here if wanted
;
_publ_section_acknowledgements
;
 ?  #Insert any acknowledgements here.
;

#===============================================================================

# If more than one structure is reported, sections 5-10 should be filled in
# per structure.  For each data set, replace the ? in the data_? line below
# by a unique identifier.

data_Zn[Au(CN)2]2(DMSO)2
#===============================================================================
# 5. CHEMICAL DATA

_chemical_formula_sum             'C8 H12 Au2 N4 O2 S2 Zn1'
_chemical_formula_moiety          'C8 H12 Au2 N4 O2 S2 Zn1'
_chemical_formula_weight            719.66
#=============================================================
# 6. CRYSTAL DATA

_symmetry_cell_setting            'Monoclinic' 
_symmetry_space_group_name_H-M    'P 1 21/c 1 ' 
loop_
 _symmetry_equiv_pos_as_xyz
 'x,y,z'
 '-x,-y,-z'
 '-x,y+1/2,-z+1/2'
 'x,-y+1/2,z+1/2'

#------------------------------------------------
_cell_length_a                    7.8403(11)
_cell_length_b                    12.8395(12)
_cell_length_c                    16.4572(17)
_cell_angle_alpha                 90
_cell_angle_beta                  98.891(10)
_cell_angle_gamma                 90
_cell_volume                      1636.8(3)
_cell_formula_units_Z                    4
_cell_measurement_reflns_used           	43
_cell_measurement_theta_min          	23.5
_cell_measurement_theta_max             	25.5
_cell_measurement_temperature          	293
  
_exptl_crystal_description        		'chunk' 
_exptl_crystal_colour             			'colourless' 
_exptl_crystal_size_min           		0.14 
_exptl_crystal_size_mid           		0.22
_exptl_crystal_size_max           		0.42
 
_exptl_crystal_density_diffrn     2.920 
_exptl_crystal_density_meas       		? 
# Non-dispersive F(000): 
_exptl_crystal_F_000              1296  
_exptl_absorpt_coefficient_mu     19.592
_exptl_absorpt_correction_type    		'Psi-scan' 
_exptl_absorpt_correction_T_min   		0.073 
_exptl_absorpt_correction_T_max   	0.262

#=============================================================================
# 7. EXPERIMENTAL DATA

_diffrn_radiation_type            'Mo K\a'
_diffrn_radiation_wavelength           0.71073
_diffrn_measurement_device_type      	'Enraf-Nonius CAD4F Diffractometer'
_diffrn_radiation_monochromator      	grphite
_diffrn_measurement_method        \w/2\q 
_diffrn_ambient_temperature          		293
_diffrn_reflns_number             5010 
_diffrn_reflns_av_R_equivalents   0.000 
_diffrn_reflns_theta_min          2.021 
_diffrn_reflns_theta_max          30.064
_diffrn_measured_fraction_theta_max 1.000 
_diffrn_reflns_theta_full         30.064 
_diffrn_measured_fraction_theta_full 1.000 
_diffrn_reflns_limit_h_min        -11 
_diffrn_reflns_limit_h_max        10 
_diffrn_reflns_limit_k_min        0 
_diffrn_reflns_limit_k_max        18 
_diffrn_reflns_limit_l_min        0 
_diffrn_reflns_limit_l_max        23 

_diffrn_standards_interval_time      		100 
_diffrn_standards_interval_count     	60 
_diffrn_standards_number             		2 
_diffrn_standards_decay_%            		2.381
 
#==========================================================================
# 8. REFINEMENT DATA

# The I/u(I) cutoff below was used for refinement as 
# well as the _gt R-factors:

_reflns_number_total              4801 

_oxford_reflns_threshold_expression_ref     I>2.5\s(I)
_refine_ls_number_reflns          2953 
_refine_ls_number_restraints      0 
_refine_ls_number_parameters      177 
_oxford_refine_ls_R_factor_ref    0.0342 
_refine_ls_wR_factor_ref          0.0396 
_refine_ls_goodness_of_fit_ref    1.5426 
_refine_ls_shift/su_max           0.001292 
 
 
# The values computed from all data 
_oxford_reflns_number_all         4801 
_refine_ls_R_factor_all           0.0849 
_refine_ls_wR_factor_all          0.0430 
 
# The values computed with a 2 sigma cutoff - a la SHELX 
_reflns_threshold_expression      I>2.0\s(I)
_reflns_number_gt                 3040 
_refine_ls_R_factor_gt            0.0362 
_refine_ls_wR_factor_gt           0.0401 


_refine_ls_structure_factor_coef  F 
_refine_ls_weighting_scheme       		calc
_refine_ls_weighting_details 
;
 Method= Modified Sheldrick 
 w=1/[\s^2^(F^2^) + ( 0.02P)^2^ + 0.00P] 
 ,where P=p(6)*max(Fo^2^,0) + (1-p(6))Fc^2^ 
;

_refine_diff_density_max          2.09
_refine_diff_density_min          -1.52

_reflns_limit_h_min               -11 
_reflns_limit_h_max               10 
_reflns_limit_k_min               0 
_reflns_limit_k_max               18 
_reflns_limit_l_min               0 
_reflns_limit_l_max               23 


_oxford_refine_ls_scale 0.9367(17) 
_oxford_diffrn_Wilson_B_factor    2.89 
_oxford_diffrn_Wilson_scale       1.32 


# Number of reflections with Friedels Law is 4801 
# Number of reflections without Friedels Law is 0 
# Theoretical number of reflections is about 4802 

 
#---------------------------------------------------------
_chemical_name_systematic        
; 
; 
# choose from 'full, fullcycle, atomblock, userblock, diagonal, sparse' 
_refine_ls_matrix_type            		full 
 
# choose from 'heavy, direct, difmap, geom' 
_atom_sites_solution_primary      direct
 
_atom_sites_solution_secondary difmap 
_atom_sites_solution_hydrogens    geom
 
# choose from 'none, undef, noref, refall, refxyz, refU, constr, mixed' 
_refine_ls_hydrogen_treatment     constr

# none if no extinction, 
_refine_ls_extinction_method 		'Larson (1970), Equation 22'

# Extinction coefficient 
_refine_ls_extinction_coef        		16.0(15)

#========================================================== 
# 9. General computing 


_computing_data_collection  'NRC DIFRAC'
_computing_data_reduction  'NRC DIFRAC'
_computing_cell_refinement  'NRC DIFRAC' 
_computing_structure_solution  'SIR92 (Altomare et al, 1994)' 
_computing_structure_refinement   'CRYSTALS (Betteridge et al., 2003)' 
_computing_publication_material   'CRYSTALS (Betteridge et al., 2003)' 
_computing_molecular_graphics     'Ortep/CAMERON (Watkin et al., 1996)' 

#===================================================================
# 10.  ATOMIC COORDINATES AND THERMAL PARAMETERS
 
loop_
_atom_type_symbol
_atom_type_scat_dispersion_real
_atom_type_scat_dispersion_imag
_atom_type_scat_Cromer_Mann_a1
_atom_type_scat_Cromer_Mann_b1
_atom_type_scat_Cromer_Mann_a2
_atom_type_scat_Cromer_Mann_b2
_atom_type_scat_Cromer_Mann_a3
_atom_type_scat_Cromer_Mann_b3
_atom_type_scat_Cromer_Mann_a4
_atom_type_scat_Cromer_Mann_b4
_atom_type_scat_Cromer_Mann_c
_atom_type_scat_source  
 Au     -2.0133   8.8022  16.8819   0.4611  18.5913   8.6216  25.5582   1.4826
   5.8600  36.3956  12.0658 'International Tables Vol C 4.2.6.8 and 6.1.1.4'
 Zn      0.2839   1.4301  14.0743   3.2655   7.0318   0.2333   5.1652  10.3163
   2.4100  58.7097   1.3041 'International Tables Vol C 4.2.6.8 and 6.1.1.4'
 S       0.1246   0.1234   6.9053   1.4679   5.2034  22.2151   1.4379   0.2536
   1.5863  56.1720   0.8669 'International Tables Vol C 4.2.6.8 and 6.1.1.4'
 O       0.0106   0.0060   3.0485  13.2771   2.2868   5.7011   1.5463   0.3239
   0.8670  32.9089   0.2508 'International Tables Vol C 4.2.6.8 and 6.1.1.4'
 N       0.0061   0.0033  12.2126   0.0057   3.1322   9.8933   2.0125  28.9975
   1.1663   0.5826 -11.5290 'International Tables Vol C 4.2.6.8 and 6.1.1.4'
 C       0.0033   0.0016   2.3100  20.8439   1.0200  10.2075   1.5886   0.5687
   0.8650  51.6512   0.2156 'International Tables Vol C 4.2.6.8 and 6.1.1.4'
 H       0.0000   0.0000   0.4930  10.5109   0.3229  26.1257   0.1402   3.1424
   0.0408  57.7998   0.0030 'International Tables Vol C 4.2.6.8 and 6.1.1.4'
 
#==============================================================================
# Uequiv = arithmetic mean of Ui
# i.e. Ueqiv = (U1+U2+U3)/3

# ..._refinement_flags_... 
# . no refinement constraints           S special position constraint on site
# G rigid group refinement of site      R riding atom
# D distance or angle restraint on site T thermal displacement constraints
# U Uiso or Uij restraint (rigid bond)  P partial occupancy constraint

loop_
_atom_site_label
_atom_site_type_symbol
_atom_site_fract_x
_atom_site_fract_y
_atom_site_fract_z
_atom_site_U_iso_or_equiv
_atom_site_occupancy
_atom_site_adp_type
_atom_site_refinement_flags_posn
_atom_site_refinement_flags_adp
_atom_site_refinement_flags_occupancy
_atom_site_disorder_assembly
_atom_site_disorder_group
_oxford_atom_site_special_shape
_atom_site_attached_hydrogens
Au1 Au 2.10662(5) 0.78728(3) 0.66625(2) 0.0408 1.0000 Uani . . . . . . . 
Au2 Au 1.97927(5) 0.98541(3) 0.23055(2) 0.0447 1.0000 Uani . . . . . . . 
Zn1 Zn 1.63548(13) 0.74399(8) 0.40261(5) 0.0272 1.0000 Uani . . . . . . . 
S1 S 1.3400(3) 0.92498(19) 0.38442(14) 0.0387 1.0000 Uani . . . . . . . 
S2 S 1.4014(3) 0.66469(19) 0.53399(14) 0.0381 1.0000 Uani . . . . . . . 
O1 O 1.4898(9) 0.8707(5) 0.4379(4) 0.0384 1.0000 Uani . . . . . . . 
O2 O 1.5259(9) 0.6386(5) 0.4749(4) 0.0423 1.0000 Uani . . . . . . . 
N1 N 1.8198(10) 0.7738(6) 0.5121(4) 0.0385 1.0000 Uani . . . . . . . 
N2 N 2.4263(11) 0.7892(7) 0.8038(4) 0.0411 1.0000 Uani . . . . . . . 
N3 N 1.7592(12) 0.8519(7) 0.3316(5) 0.0481 1.0000 Uani . . . . . . . 
N4 N 2.2114(10) 1.1262(6) 0.1380(5) 0.0398 1.0000 Uani . . . . . . . 
C1 C 1.9215(12) 0.7785(7) 0.5701(5) 0.0385 1.0000 Uani . . . . . . . 
C2 C 2.3078(13) 0.7924(7) 0.7558(5) 0.0379 1.0000 Uani . . . . . . . 
C3 C 1.8354(13) 0.9002(9) 0.2939(6) 0.0468 1.0000 Uani . . . . . . . 
C4 C 2.1244(12) 1.0752(8) 0.1712(5) 0.0398 1.0000 Uani . . . . . . . 
C5 C 1.1952(14) 0.9591(9) 0.4544(7) 0.0578 1.0000 Uani . . . . . . 3 
C6 C 1.4160(15) 1.0522(8) 0.3670(6) 0.0504 1.0000 Uani . . . . . . 3
C7 C 1.2193(14) 0.5868(10) 0.5007(7) 0.0590 1.0000 Uani . . . . . . 3 
C8 C 1.4841(16) 0.5978(9) 0.6254(6) 0.0548 1.0000 Uani . . . . . . 3
H51 H 1.1416 0.8978 0.4705 0.07(2) 1.0000 Uiso R . . . . . . 
H52 H 1.2576 0.9919 0.5015 0.07(2) 1.0000 Uiso R . . . . . . 
H53 H 1.1094 1.0054 0.4281 0.07(2) 1.0000 Uiso R . . . . . . 
H61 H 1.4973 1.0484 0.3299 0.06(2) 1.0000 Uiso R . . . . . . 
H62 H 1.4698 1.0814 0.4176 0.06(2) 1.0000 Uiso R . . . . . . 
H63 H 1.3216 1.0948 0.3441 0.06(2) 1.0000 Uiso R . . . . . . 
H71 H 1.1597 0.6139 0.4504 0.10(3) 1.0000 Uiso R . . . . . . 
H72 H 1.1448 0.5874 0.5411 0.10(3) 1.0000 Uiso R . . . . . . 
H73 H 1.2548 0.5174 0.4924 0.10(3) 1.0000 Uiso R . . . . . . 
H81 H 1.5859 0.6318 0.6511 0.09(2) 1.0000 Uiso R . . . . . . 
H82 H 1.4006 0.5979 0.6616 0.09(2) 1.0000 Uiso R . . . . . . 
H83 H 1.5106 0.5279 0.6129 0.09(2) 1.0000 Uiso R . . . . . . 

loop_
_atom_site_aniso_label
_atom_site_aniso_U_11
_atom_site_aniso_U_22
_atom_site_aniso_U_33
_atom_site_aniso_U_23
_atom_site_aniso_U_13
_atom_site_aniso_U_12
Au1 0.0309(2) 0.0524(3) 0.03498(18) -0.00166(17) -0.00746(14) 0.00710(19) 
Au2 0.0325(2) 0.0605(3) 0.0411(2) 0.01385(18) 0.00597(15) -0.01314(19) 
Zn1 0.0219(5) 0.0322(5) 0.0270(4) 0.0008(4) 0.0020(4) 0.0001(4) 
S1 0.0348(13) 0.0358(13) 0.0418(12) -0.0034(10) -0.0060(10) 0.0065(11) 
S2 0.0407(14) 0.0359(13) 0.0401(12) 0.0027(10) 0.0140(10) 0.0057(11) 
O1 0.037(4) 0.033(4) 0.043(3) 0.001(3) 0.001(3) 0.008(3) 
O2 0.045(4) 0.042(4) 0.045(4) 0.004(3) 0.023(3) 0.001(3) 
N1 0.031(4) 0.043(5) 0.039(4) 0.001(3) -0.003(3) 0.003(4) 
N2 0.034(4) 0.052(5) 0.036(4) 0.006(4) -0.001(3) 0.000(4) 
N3 0.051(6) 0.052(5) 0.042(4) 0.008(4) 0.009(4) -0.012(5) 
N4 0.036(5) 0.045(5) 0.040(4) 0.009(4) 0.010(4) -0.003(4) 
C1 0.029(5) 0.042(6) 0.040(5) 0.000(4) -0.009(4) 0.006(4) 
C2 0.040(6) 0.036(5) 0.035(4) 0.002(4) -0.006(4) 0.007(5) 
C3 0.031(5) 0.069(7) 0.040(5) 0.013(5) 0.004(4) -0.014(5) 
C4 0.030(5) 0.050(6) 0.037(5) 0.003(4) -0.001(4) -0.008(5) 
C5 0.040(6) 0.062(8) 0.075(8) 0.005(6) 0.019(6) 0.004(6) 
C6 0.056(7) 0.046(6) 0.047(6) 0.012(5) 0.003(5) 0.001(6) 
C7 0.040(6) 0.077(9) 0.058(6) 0.004(6) -0.001(5) -0.003(6) 
C8 0.065(8) 0.059(7) 0.040(5) -0.004(5) 0.007(5) 0.000(6) 


loop_
 _geom_bond_atom_site_label_1
 _geom_bond_site_symmetry_1
 _geom_bond_atom_site_label_2
 _geom_bond_site_symmetry_2
 _geom_bond_distance
 _geom_bond_publ_flag
Au1 . Au2 2_976 3.4942(6)    yes
Au1 . C1 . 1.978(8)    yes
Au1 . C2 . 1.986(9)    yes
Au2 . C3 . 1.980(10)    yes
Au2 . C4 . 1.980(10)    yes
Zn1 . N2 4_464 2.166(8)    yes
Zn1 . N4 3_945 2.104(8)    yes
Zn1 . O1 . 2.120(6)    yes
Zn1 . O2 . 2.074(6)    yes
Zn1 . N1 . 2.163(7)    yes
Zn1 . N3 . 2.139(8)    yes
S1 . O1 . 1.523(6)    yes
S1 . C5 . 1.792(10)    yes
S1 . C6 . 1.777(10)    yes
S2 . O2 . 1.518(6)    yes
S2 . C7 . 1.760(11)    yes
S2 . C8 . 1.767(10)    yes
N1 . C1 . 1.147(11)    yes
N2 . C2 . 1.123(11)    yes
N3 . C3 . 1.114(11)    yes
N4 . C4 . 1.143(11)    yes
C5 . H51 . 0.950    no
C5 . H52 . 0.950    no
C5 . H53 . 0.950    no
C6 . H61 . 0.950    no
C6 . H62 . 0.950    no
C6 . H63 . 0.950    no
C7 . H71 . 0.950    no
C7 . H72 . 0.950    no
C7 . H73 . 0.950    no
C8 . H81 . 0.950    no
C8 . H82 . 0.950    no
C8 . H83 . 0.950    no

loop_
 _geom_angle_atom_site_label_1
 _geom_angle_site_symmetry_1
 _geom_angle_atom_site_label_2
 _geom_angle_site_symmetry_2
 _geom_angle_atom_site_label_3
 _geom_angle_site_symmetry_3
 _geom_angle
 _geom_angle_publ_flag
Au2 2_976 Au1 . C1 . 105.3(3)    yes
Au2 2_976 Au1 . C2 . 78.6(3)    yes
C1 . Au1 . C2 . 174.7(4)    yes
Au1 2_976 Au2 . C3 . 92.2(3)    yes
Au1 2_976 Au2 . C4 . 85.5(3)    yes
C3 . Au2 . C4 . 177.5(4)    yes
N2 4_464 Zn1 . N4 3_945 91.3(3)    yes
N2 4_464 Zn1 . O1 . 88.8(3)    yes
N4 3_945 Zn1 . O1 . 175.7(3)    yes
N2 4_464 Zn1 . O2 . 88.3(3)    yes
N4 3_945 Zn1 . O2 . 91.2(3)    yes
O1 . Zn1 . O2 . 93.2(3)    yes
N2 4_464 Zn1 . N1 . 172.5(3)    yes
N4 3_945 Zn1 . N1 . 92.9(3)    yes
O1 . Zn1 . N1 . 87.4(3)    yes
O2 . Zn1 . N1 . 85.4(3)    yes
N2 4_464 Zn1 . N3 . 94.1(3)    yes
N4 3_945 Zn1 . N3 . 87.9(3)    yes
O1 . Zn1 . N3 . 87.8(3)    yes
O2 . Zn1 . N3 . 177.4(3)    yes
N1 . Zn1 . N3 . 92.3(3)    yes
O1 . S1 . C5 . 104.4(5)    yes
O1 . S1 . C6 . 105.4(4)    yes
C5 . S1 . C6 . 98.1(5)    yes
O2 . S2 . C7 . 104.3(5)    yes
O2 . S2 . C8 . 104.5(5)    yes
C7 . S2 . C8 . 99.3(5)    yes
Zn1 . O1 . S1 . 126.3(4)    yes
Zn1 . O2 . S2 . 126.0(4)    yes
Zn1 . N1 . C1 . 172.7(8)    yes
Zn1 4_665 N2 . C2 . 169.5(8)    yes
Zn1 . N3 . C3 . 172.9(10)    yes
Zn1 3_955 N4 . C4 . 167.3(8)    yes
Au1 . C1 . N1 . 176.9(9)    yes
Au1 . C2 . N2 . 174.9(9)    yes
Au2 . C3 . N3 . 177.5(9)    yes
Au2 . C4 . N4 . 178.4(9)    yes
S1 . C5 . H51 . 109.2    no
S1 . C5 . H52 . 109.6    no
H51 . C5 . H52 . 109.5    no
S1 . C5 . H53 . 109.5    no
H51 . C5 . H53 . 109.5    no
H52 . C5 . H53 . 109.5    no
S1 . C6 . H61 . 109.3    no
S1 . C6 . H62 . 109.6    no
H61 . C6 . H62 . 109.5    no
S1 . C6 . H63 . 109.5    no
H61 . C6 . H63 . 109.5    no
H62 . C6 . H63 . 109.5    no
S2 . C7 . H71 . 109.3    no
S2 . C7 . H72 . 109.5    no
H71 . C7 . H72 . 109.5    no
S2 . C7 . H73 . 109.6    no
H71 . C7 . H73 . 109.5    no
H72 . C7 . H73 . 109.5    no
S2 . C8 . H81 . 109.1    no
S2 . C8 . H82 . 109.6    no
H81 . C8 . H82 . 109.5    no
S2 . C8 . H83 . 109.7    no
H81 . C8 . H83 . 109.5    no
H82 . C8 . H83 . 109.5    no

loop_
 _geom_hbond_atom_site_label_D
 _geom_hbond_site_symmetry_D
 _geom_hbond_atom_site_label_H
 _geom_hbond_site_symmetry_H
 _geom_hbond_atom_site_label_A
 _geom_hbond_site_symmetry_A
 _geom_hbond_angle_DHA
 _geom_hbond_distance_DH
 _geom_hbond_distance_HA
 _geom_hbond_distance_DA
 _geom_hbond_publ_flag
C6 . H62 . O1 2_876 159 0.95 2.43 3.332(15)    yes
C8 . H83 . O2 2_866 154 0.95 2.57 3.450(15)    yes
